# Supplementary material
Source: publisher site journal article supplement (https://oneecosystem.pensoft.net/article/download/suppl/3333139/)
Supplement: Supplementary file 1

## Sheet: Sheet1
Region	1 Assessment of Biological values (%)	5 Environmental Impact Assessment(EIA) (%)	8 protected areas (%)	Inhabitants	Municipality area (km2)	Personsper Km2
Skåne län	50 or more	50 or more	6-10	135344	343.89	393.568
Skåne län	50 or more	50 or more	2-5	22946	55.51	413.367
Skåne län	50 or more	50 or more	<2	12400	162.49	76.3124
Skåne län	50 or more	50 or more	<2	25298	143.5	176.293
Skåne län	50 or more	50 or more	<2	7174	158.77	45.1849				Biological assessment				EIA
Skåne län	50 or more	25 or less	2-5	115968	427.07	271.543				Km2	Pers/km2			pers	Km2	Pers/km2
Skåne län	50 or more	25 or less	<2	18905	392.34	48.1852				357.083	70.9597		25 or less	58716.5	473.405	242.088
Skåne län	50 or more	50 or more	<2	34110	142.66	239.1				342.569	228.781		50 or more	29291.3	289.23	184.77
Skåne län	between 25-50	50 or more	2-5	14419	217.13	66.4072
Skåne län	50 or more	50 or more	0	12828	576.38	22.2562
Skåne län	between 25-50	50 or more	<2	81826	1245.22	65.7121
Skåne län	between 25-50	25 or less	>15	28254	825.29	34.2352
Skåne län	50 or more	50 or more	<2	14894	115.31	129.165
Skåne län	between 25-50	50 or more	2-5	30490	140.26	217.382
Skåne län	50 or more	25 or less	6-10	13460	387.18	34.7642
Skåne län	25 or less	50 or more	<2	13007	395.93	32.8518
Skåne län	between 25-50	25 or less	<2	42973	339.8	126.466
Skåne län	25 or less	25 or less	<2	32179	419.02	76.7959
Skåne län	50 or more	50 or more	<2	9733	319.5	30.4632
Skåne län	50 or more	25 or less	2-5	318107	156.6	2031.33
Skåne län	between 25-50	50 or more	<2	20248	217.91	92.9191
Skåne län	50 or more	25 or less	0	13864	431.84	32.1045
Skåne län	50 or more	50 or more	<2	16733	374.32	44.7024
Skåne län	50 or more	0	<2	15770	290.55	54.2764
Skåne län	50 or more	25 or less	<2	50565	1268.97	39.8473					Skåne region	Sweden
Skåne län	50 or more	25 or less	<2	14927	419.37	35.5939				25 or less	13.7931	29.3413
Skåne län	25 or less	25 or less	<2	40229	419.87	95.813				between 25-50	24.1379	22.7545
Skåne län	between 25-50	50 or more	<2	17211	18.9	910.635				50 or more	62.069	47.9042
Skåne län	25 or less	25 or less	<2	15167	193.51	78.3784
